# Supplementary material for: Activating Co nanoparticles on graphitic carbon nitride by tuning the Schottky barrier via P doping for the efficient dehydrogenation of ammonia-borane
Source: Royal Society of Chemistry journal article supplement (doi:10.1039/d0qi00659a), 2020-08-24
Supplement: d0qi00659a1.pdf [file d0qi00659a1.pdf]

## Electronic Supplementary Information

### Activating Co nanoparticles on graphitic carbon nitride *via* tuning the Schottky barrier by P doping for the efficient dehydrogenation of ammonia-borane

Shao-Hong Xu,<sup>a</sup> Jing-Feng Wang,<sup>\*b,c</sup> Alexandra Valério,<sup>d</sup> Wen-Yu Zhang,<sup>a</sup> Jia-Lun Sun,<sup>a</sup> and Dan-Nong He<sup>\*a,b</sup>

<sup>a</sup> School of Materials Science and Engineering, Shanghai Jiao Tong University, 800 Dongchuan Road Shanghai 200240, P. R. China.

E-mail:

<sup>b</sup> National Engineering Research Center for Nanotechnology, 28 East Jiangchuan Road, Min Hang District, Shanghai 200241, P.R. China. E-mail:

<sup>c</sup> Shanghai University of Medicine & Health Sciences, 279 Zhouzhu highway, Shanghai, 201318, P. R. China.

<sup>d</sup> Department of Chemical Engineering and Food Engineering, Federal University of Santa Catarina, 88040-900 Florianópolis, SC, Brazil.

Corresponding author e-mail address: [hdn\\_nercn@163.com](mailto:hdn_nercn@163.com); [jfwang@shu.edu.cn](mailto:jfwang@shu.edu.cn).

## Table of content

|                                                                                                                                                                          |    |
|--------------------------------------------------------------------------------------------------------------------------------------------------------------------------|----|
| <b>Fig. S1</b> EDS elemental mapping images of P <sub>0</sub> CN.                                                                                                        | 3  |
| <b>Fig. S2</b> EDS elemental mapping images of P <sub>3.59</sub> CN.                                                                                                     | 4  |
| <b>Fig. S3</b> Photographs of P <sub>0</sub> CN, P <sub>2.16</sub> CN, P <sub>3.59</sub> CN, P <sub>5.26</sub> CN, and P <sub>8.49</sub> CN.                             | 5  |
| <b>Fig. S4</b> Typical TEM (a) and HRTEM (b) images of Co/P <sub>3.59</sub> CN.                                                                                          | 6  |
| <b>Fig. S5</b> XRD pattern of Co/P <sub>3.59</sub> CN.                                                                                                                   | 7  |
| <b>Fig. S6</b> Co2p deconvoluted XPS spectra of Co/P <sub>3.59</sub> CN before (a) and after (b) etching treatment.                                                      | 8  |
| <b>Fig. S7</b> Typical TEM (a-b) images of Co/P <sub>3.59</sub> CN catalysts after eight cycles and XRD patterns(c) of fresh and used Co/P <sub>3.59</sub> CN catalysts. | 9  |
| <b>Fig. S8</b> UV/Vis diffuse reflection spectra of P <sub>3.59</sub> CN and Co/P <sub>3.59</sub> CN.                                                                    | 10 |
| <b>Fig. S9</b> Photographs of P <sub>3.59</sub> CN and Co/P <sub>3.59</sub> CN.                                                                                          | 11 |
| <b>Table S1</b> The P atomic percentage of P <sub>0</sub> CN, P <sub>2.16</sub> CN, P <sub>3.59</sub> CN, P <sub>5.26</sub> CN, and P <sub>8.49</sub> CN.                | 12 |

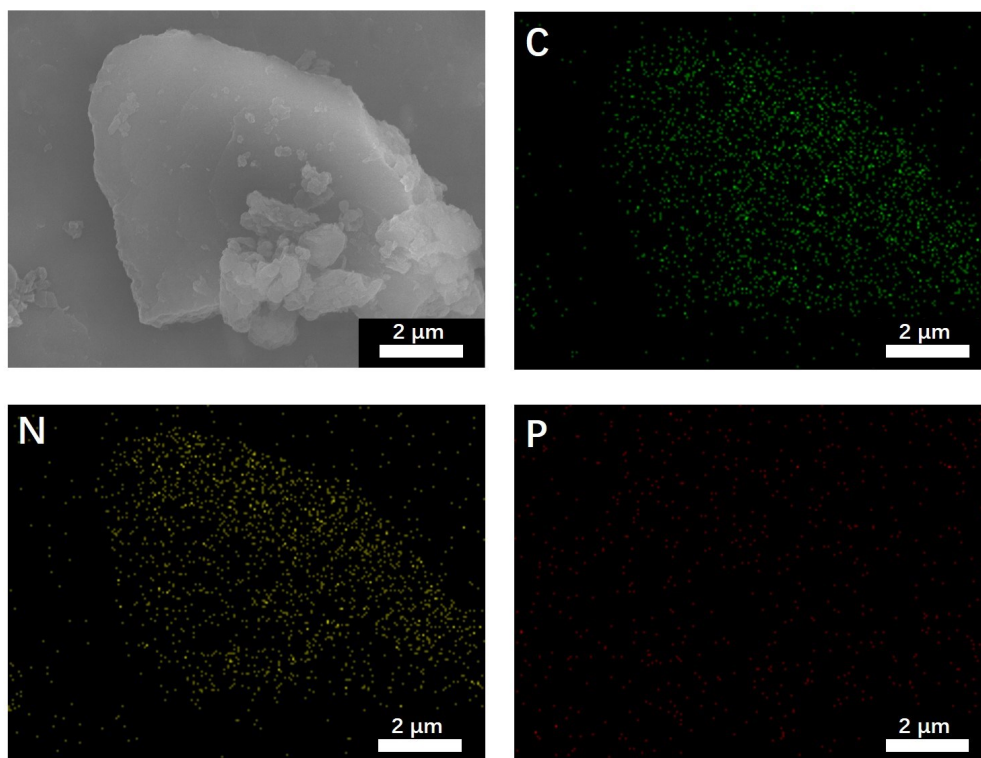

**Fig. S1** EDS elemental mapping images of  $P_0CN$ .

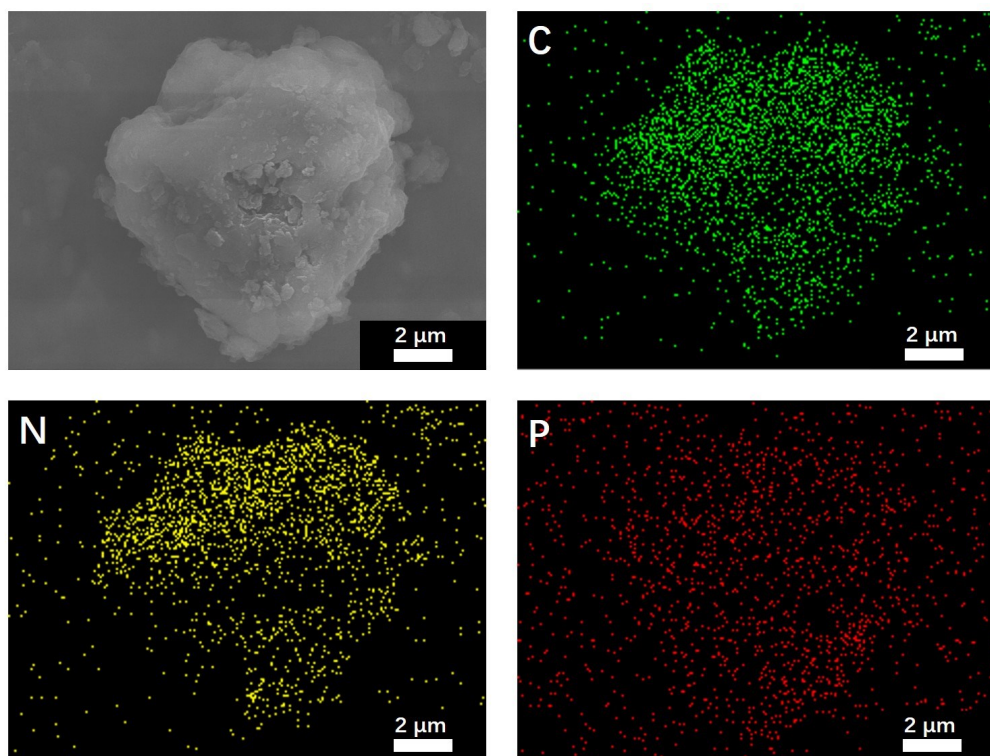

**Fig. S2** EDS elemental mapping images of  $P_{3.59}CN$ .

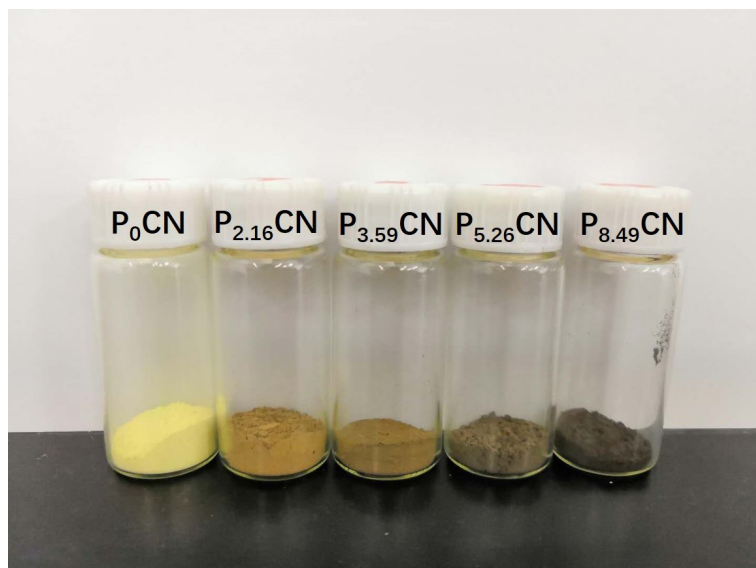

**Fig. S3** Photographs of P<sub>0</sub>CN, P<sub>2.16</sub>CN, P<sub>3.59</sub>CN, P<sub>5.26</sub>CN, and P<sub>8.49</sub>CN. It is shown a significant color change from pale yellow to black for the samples.

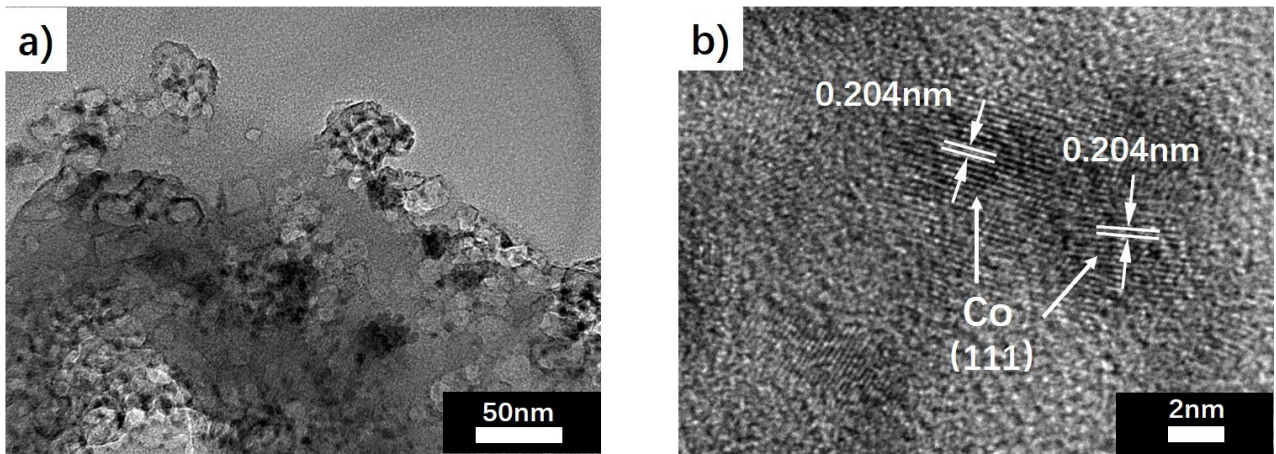

**Fig. S4** Typical TEM (a) and HRTEM (b) images of Co/P<sub>3.59</sub>CN. The interlayer space of 0.204 nm in Co/P<sub>3.59</sub>CN is ascribed to the (111) lattice plane of metallic cobalt nanocrystal.

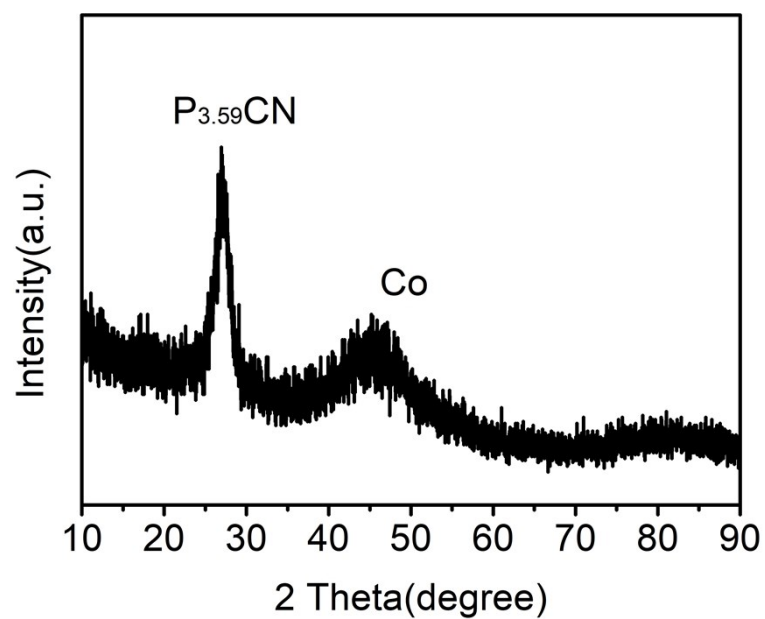

**Fig. S5** XRD pattern of Co/P<sub>3.59</sub>CN. When Co NPs are introduced into P<sub>3.59</sub>CN, a weak and broad peak located at 44.2° is observed, indicating the formation of metallic Co NPs. The diffraction peak located at 27.3° which corresponds to P<sub>3.59</sub>CN exhibits no obvious change after the loading of Co NPs.

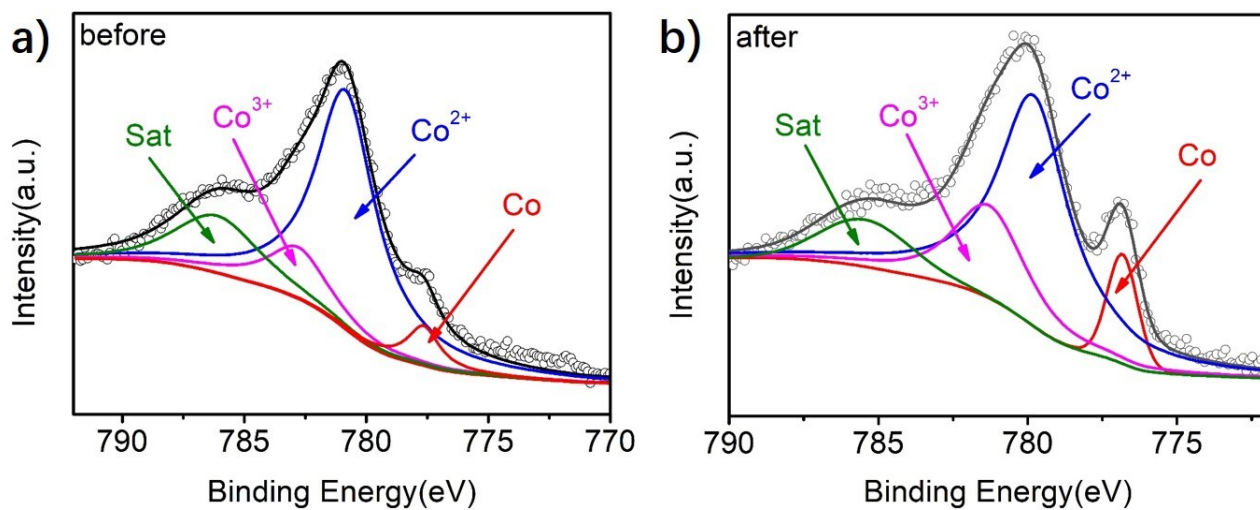

**Fig. S6** Co<sub>2p</sub> deconvoluted XPS spectra of Co/P<sub>3.59</sub>CN before (a) and after (b) etching treatment.

The peak of metallic Co is obviously enhanced after etching, indicating that metallic Co NPs are existed under the oxidation layer.



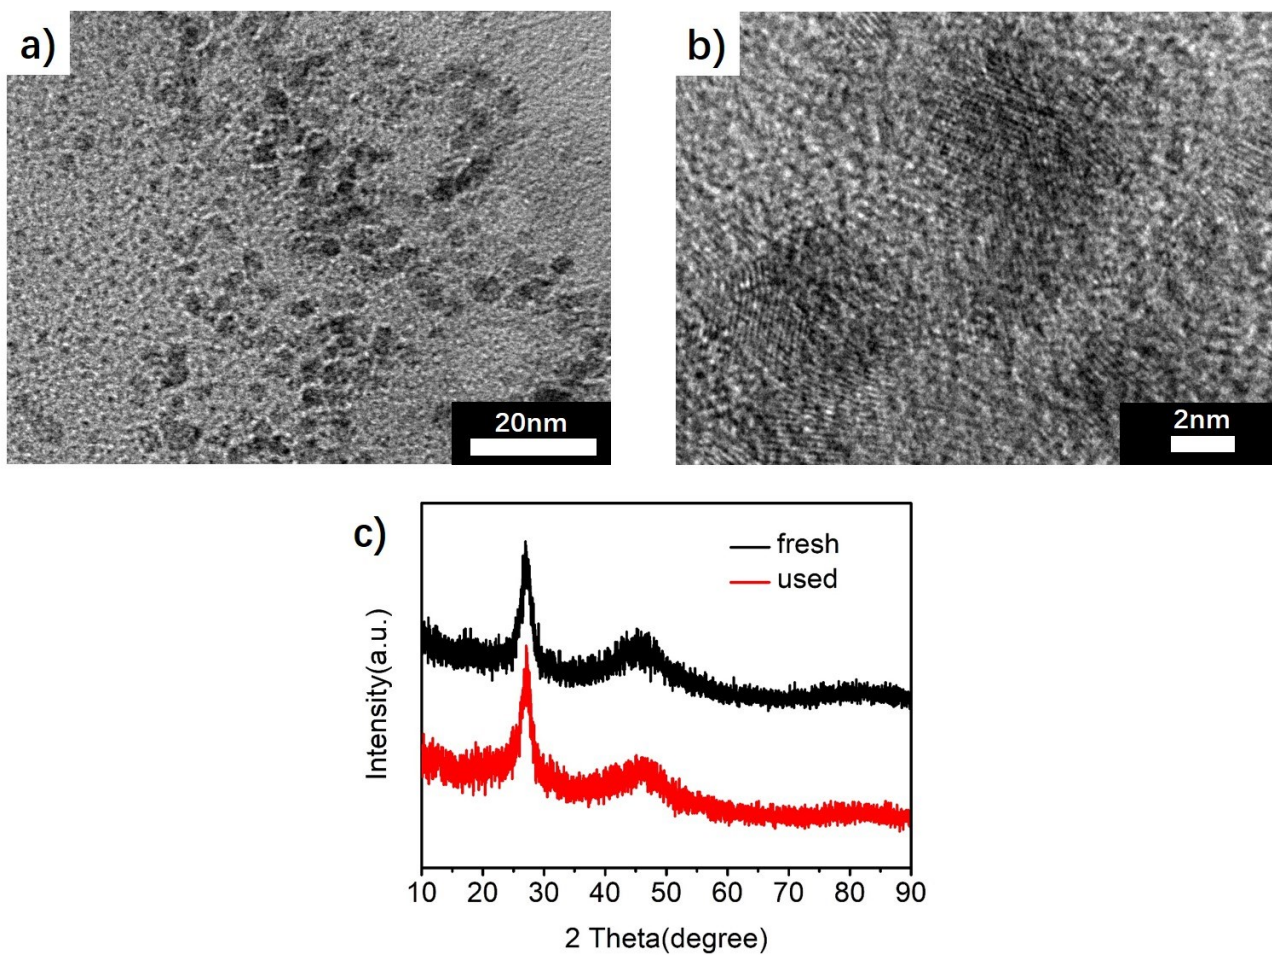

**Fig. S7** Typical TEM (a-b) images of Co/P<sub>3.59</sub>CN catalysts after eight cycles and XRD patterns(c) of fresh and used Co/P<sub>3.59</sub>CN catalysts. No obvious change was found in the Co/P<sub>3.59</sub>CN catalysts after eight cycles, indicating the good stability of Co/P<sub>3.59</sub>CN.

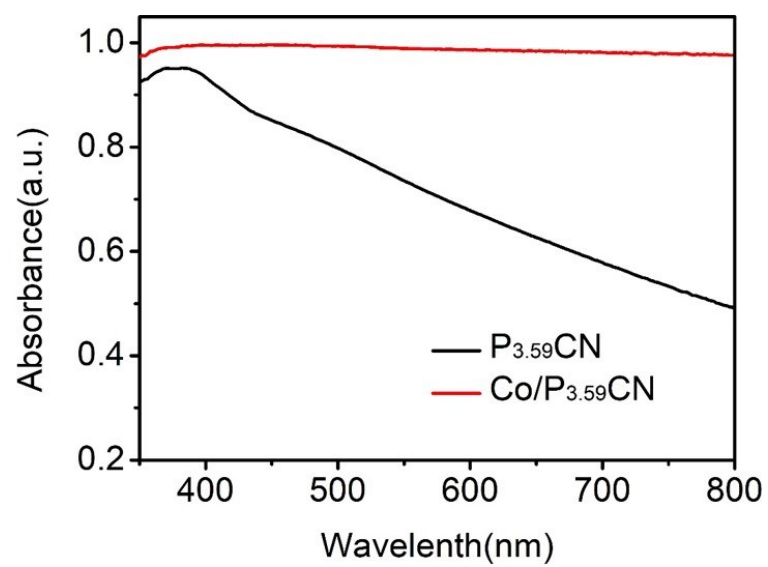

**Fig. S8** UV/Vis diffuse reflection spectra of P<sub>3.59</sub>CN and Co/P<sub>3.59</sub>CN.

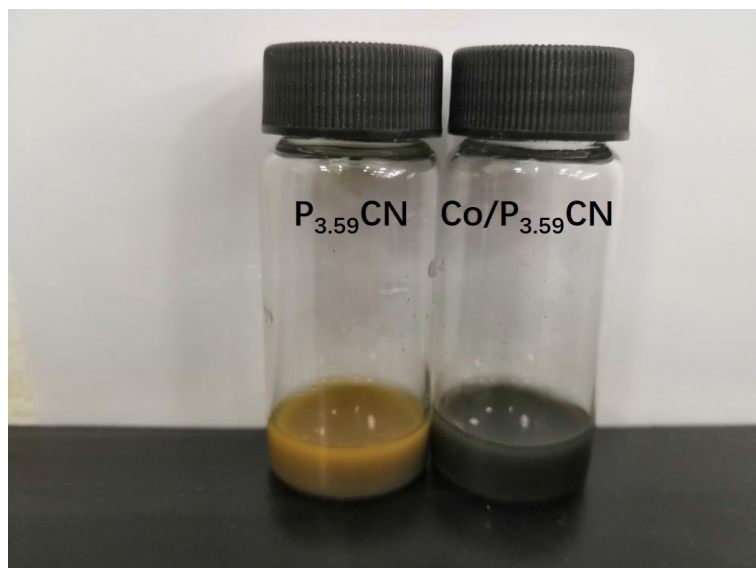

**Fig. S9** Photographs of P<sub>3.59</sub>CN and Co/P<sub>3.59</sub>CN.

**Table S1** The P atomic percentage of P<sub>0</sub>CN, P<sub>2.16</sub>CN, P<sub>3.59</sub>CN, P<sub>5.26</sub>CN, and P<sub>8.49</sub>CN.

| Samples              | HEDP amount (g) | P (%) |
|----------------------|-----------------|-------|
| P <sub>0</sub> CN    | 0               | 0     |
| P <sub>2.16</sub> CN | 0.2             | 2.16  |
| P <sub>3.59</sub> CN | 0.4             | 3.59  |
| P <sub>5.26</sub> CN | 0.6             | 5.26  |
| P <sub>8.49</sub> CN | 0.8             | 8.49  |
